# Supplementary material for: SP1-mediated up-regulation of lncRNA TUG1 underlines an oncogenic property in colorectal cancer
Source: PubMed Central journal article supplement (PMC9068916; doi:10.1038/s41419-022-04805-w), 2022-05-04
Supplement: 41419_2022_4805_MOESM1_ESM.pdf [file 41419_2022_4805_MOESM1_ESM.pdf]

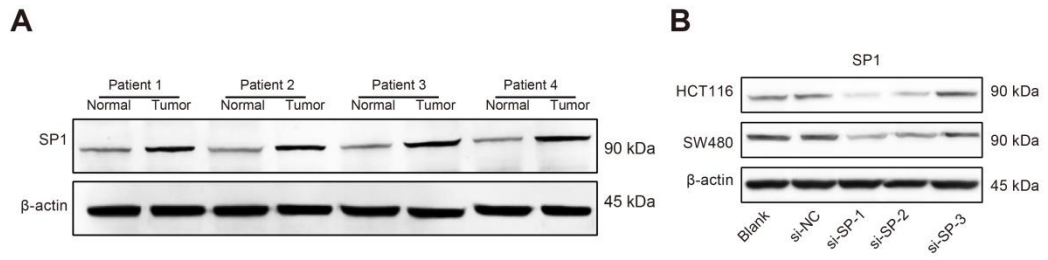

**Supplementary Fig. 1** The representative Western blots of the panel C and F of Fig. 1.

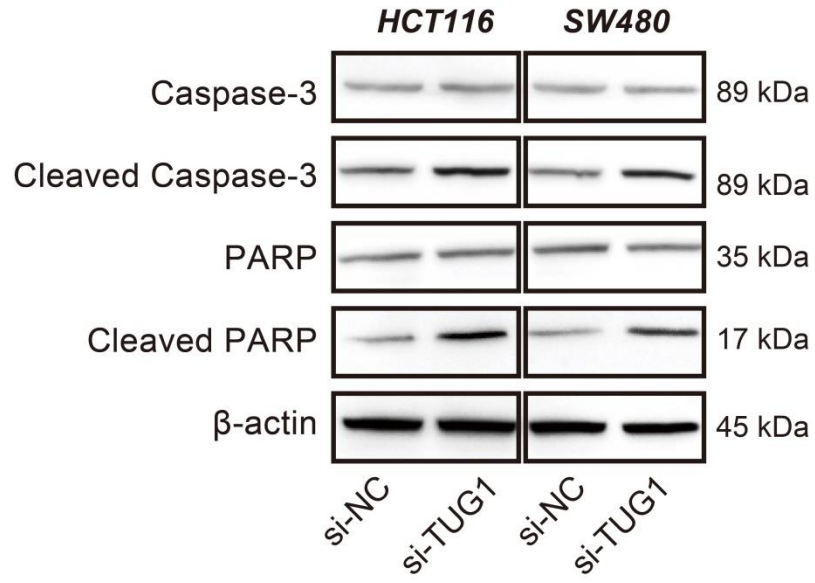

Supplementary Fig. 2 The representative Western blots of the panel E of Fig. 2.

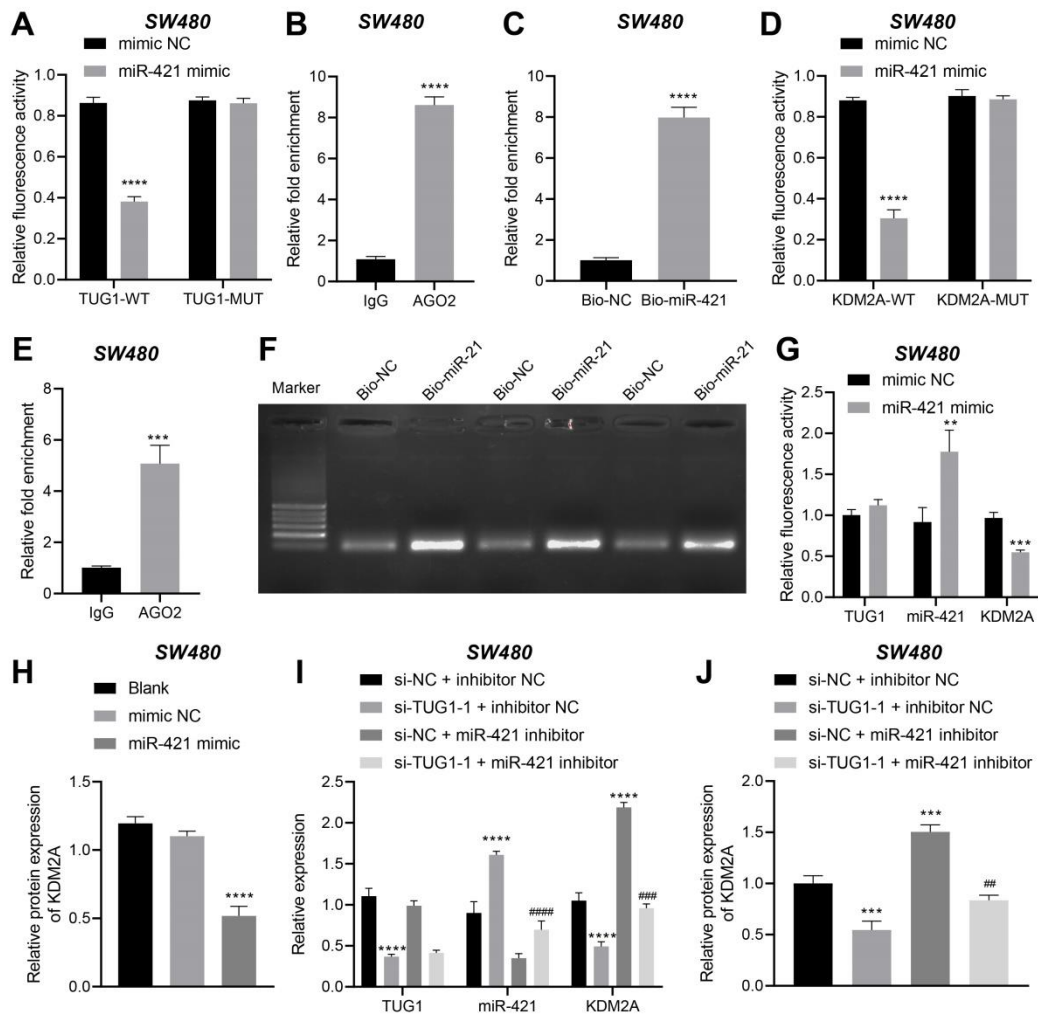

**Supplementary Fig. 3 TUG1 positively regulates KDM2A by binding to miR-421 in SW480 cells.** A: The binding of TUG1 to miR-421 in SW480 cells verified by dual-luciferase reporter assay. B: The binding of TUG1 to miR-421 in SW480 cells tested by RIP assay in combination with qPCR. C: The binding of TUG1 to miR-421 in SW480 cells tested using RNA pull-down. D: The binding between miR-421 and KDM2A in SW480 cells identified using dual-luciferase reporter assay. E: The binding of miR-421 to KDM2A in SW480 cells tested by RIP assay in combination with qPCR. F: The binding of miR-421 to KDM2A in SW480 cells tested using RNA pull-down. G: Determination of TUG1, miR-421 and KDM2A expression in SW480 cells transfected with miR-421 mimic by RT-qPCR. H: Measurement of KDM2A protein level in SW480 cells transfected with miR-421 mimic by Western blot assay. I: Determination of TUG1, miR-421 and KDM2A expression in SW480 cells transfected with si-TUG1-1 or combined with miR-421 inhibitor by RT-qPCR. J: Measurement of KDM2A protein level in SW480 cells transfected with si-TUG1-1 or combined with miR-421 inhibitor by Western blot assay. \*\* $p < 0.01$ , \*\*\* $p < 0.001$  and \*\*\*\* $p < 0.0001$ , compared with SW480 cells transfected with mimic NC or si-NC + inhibitor NC, or SW480 cells incubated with IgG or Bio-NC. ## $p < 0.01$ ,

### $p < 0.001$ , and #### $p < 0.0001$ , compared with SW480 cells transfected with si-TUG1-1 + inhibitor NC. The measurement data are expressed as mean  $\pm$  standard deviation. The experiments were repeated three times independently. Comparison between two groups was conducted by unpaired *t*-test. Multi-group comparison was conducted by one-way ANOVA with Tukey's *post hoc* test.

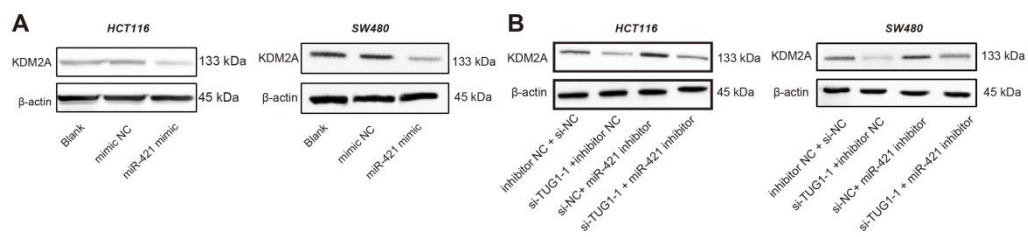

**Supplementary Fig. 4** The representative Western blots of the panel K and M of Fig. 3, as well as panel H and J of Supplementary Fig. 3.

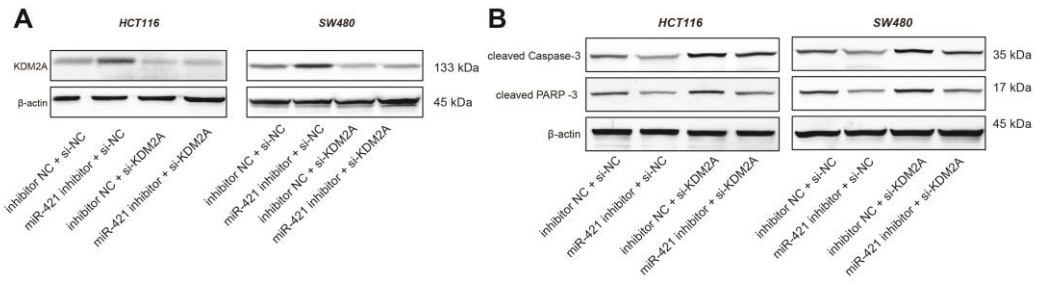

**Supplementary Fig. 5** The representative Western blots of the panel B and F of Fig. 4.

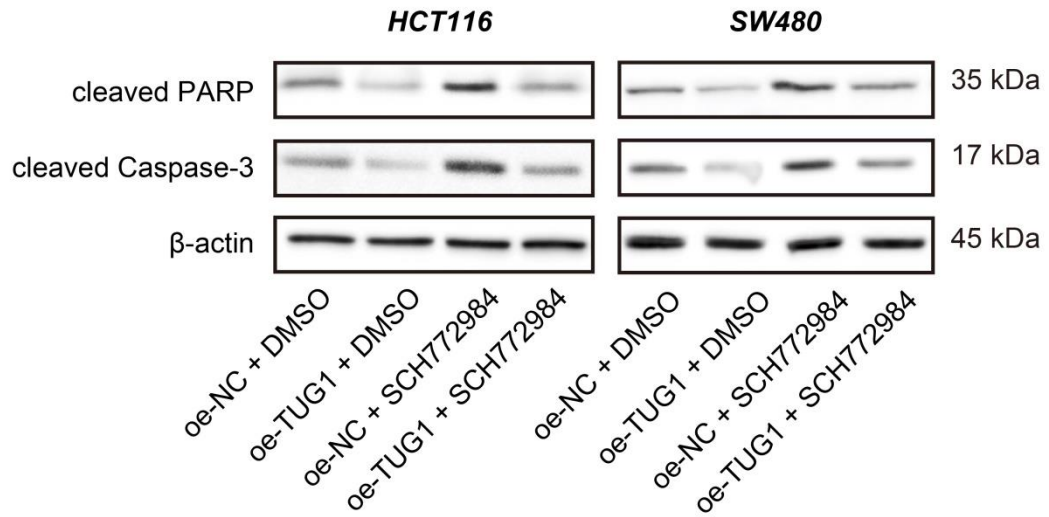

**Supplementary Fig. 6** The representative Western blots of the panel E of Fig. 5.

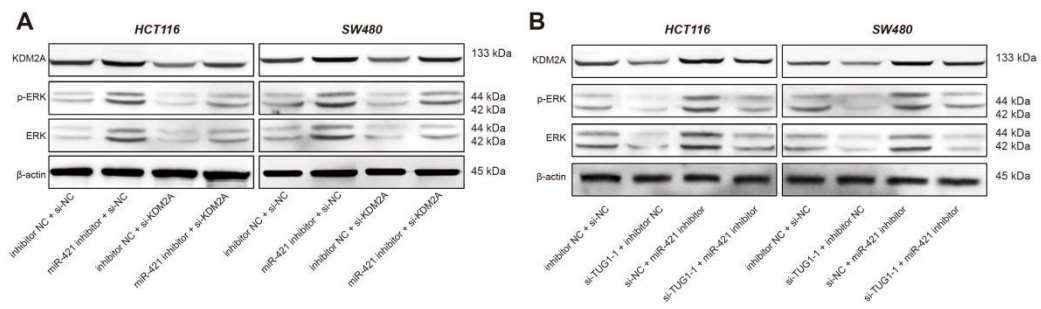

**Supplementary Fig. 7** The representative Western blots of the panel B and C of Fig. 6.



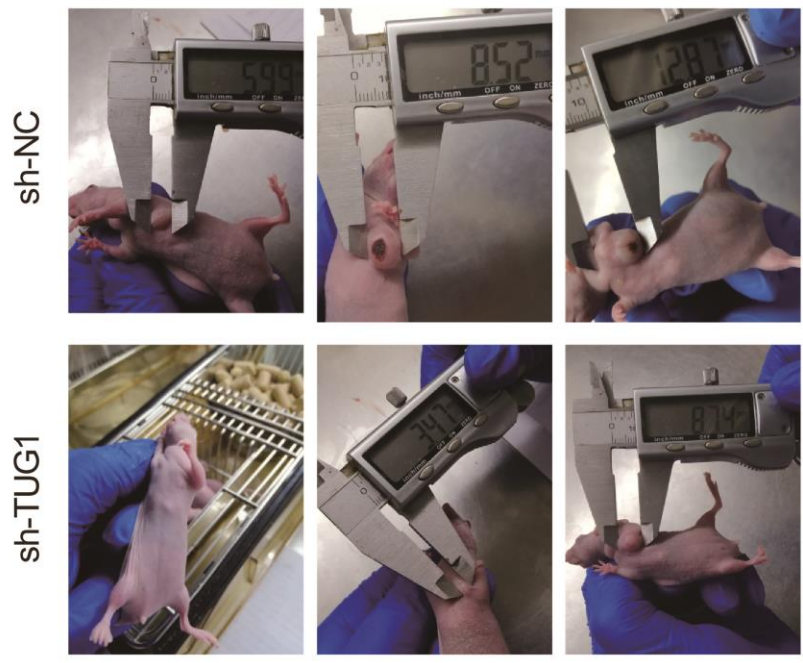

**Supplementary Fig. 8 Measurement of long and short diameter of nude mice bearing tumors.**

**Supplementary Table 1** Sequences of siRNAs

| siRNA     | Forward (5'→3')           | Reverse (5'→3')           |
|-----------|---------------------------|---------------------------|
| si-SP1-1  | CAGAUACCAGACCUCUUCU       | AGAAGAGGUCUGGUAUC UG      |
| si-SP1-2  | CCAACAGAUUAUCACAAAU       | UUGUUUGUCUGAUCGGCUCTT     |
| si-SP1-3  | UGAUCUGCCUCUCAACUGCCC     | UACCGGGAAACUGGAGCACU      |
| si-TUG1-1 | GGCUGAUGCAUAUGGUACATT     | UGUACCAUAUGCAUCAGCCTT     |
| si-TUG1-2 | CCCUCCAUGAAUACCUGAATT     | UUCAGGUAUUCAUGGAGGGTT     |
| si-KDM2A  | GAACCCGAAGAAGAAAGGAUUCGUU | AACGAAUCCUUUCUUCUUCGGGUUC |

**Supplementary Table 2** Sequences of RT-qPCR

| Genes   | Forward (5'→3')            | Reverse (5'→3')          |
|---------|----------------------------|--------------------------|
| SP1     | CCATACCCCTTAACCCCG         | GAATTTTCACTAATGTTTCCCACC |
| TUG1    | TAGCAGTTCCCAATCCTTG        | CACAAATTCCCATCAT TCCC    |
| KDM2A   | TCCCCACACACATTTTGACATC     | GGGGTGGCTTGAGAGATCCT     |
| miR-421 | CTCACTCACATCAACAGACATTAATT | TATGGTTGTTCTGCTCTCTGTGTC |
| U6      | GGAACGCTTCACGAATTTG        | ATTGGAACGATACAGAGAAGATT  |
| GAPDH   | GGACCTGACCTGCCGTCTAG       | GTAGCCCAGGATGCCCTTGA     |

**Supplementary Table 3** Correlation of TUG1 expression with the clinicopathological characteristics of colorectal cancer patients

| Variables   | Cases | TUG1 expression |               | <i>p</i> value |
|-------------|-------|-----------------|---------------|----------------|
|             |       | Low (n = 10)    | High (n = 10) |                |
| Age (years) |       |                 |               | 0.178          |
| ≥ 60        | 11    | 7               | 4             |                |
| < 60        | 9     | 3               | 6             |                |
| Gender      |       |                 |               | 0.658          |
| Female      | 9     | 5               | 4             |                |
| Male        | 11    | 5               | 6             |                |
| Tumor size  |       |                 |               | 0.006          |
| ≥ 5 cm      | 8     | 1               | 7             |                |
| < 5 cm      | 12    | 9               | 3             |                |
| TNM stage   |       |                 |               | 0.028          |
| I           | 7     | 6               | 1             |                |
| II          | 6     | 3               | 3             |                |
| III         | 7     | 1               | 6             |                |
| LNM         |       |                 |               | 0.019          |
| Yes         | 7     | 1               | 6             |                |
| No          | 13    | 9               | 4             |                |

Note: LncRNA, long non-coding RNA; TUG1, Taurine up-regulated gene 1; TNM, tumor node metastasis; LNM, lymph node metastasis.
